# Supplementary material for: Electrocatalytic reduction of N2 to NH3 by MIL-88-derived pod-like Fe7Se8/C nanomaterials under ambient conditions
Source: Royal Society of Chemistry journal article supplement (doi:10.1039/d4cc04683h), 2024-01-01
Supplement: d4cc04683h1.pdf [file d4cc04683h1.pdf]

## Supporting Information

### **Electrocatalytic reduction of N<sub>2</sub> to NH<sub>3</sub> by MIL-88 derived pod-like Fe<sub>7</sub>Se<sub>8</sub>/C nanomaterials under ambient conditions**

Gongyao Nie,<sup>a</sup> Huanhuan Zhang,<sup>a</sup> Lanhua Yi,<sup>\*a</sup> Xiao Ma,<sup>a</sup> Wei Yi,<sup>\*c</sup> Jiawei Wan,<sup>e,f</sup>  
Yebo Lu<sup>\*b</sup> and Xingzhu Wang<sup>\*d</sup>

<sup>a</sup> Key Laboratory of Environmentally Friendly Chemistry and Applications of Ministry of Education, School of Chemistry, Xiangtan University, Xiangtan 411105, PR China

<sup>b</sup> College of Information Science and Engineering, Jiaxing University, Jiaxing 314001, PR China

<sup>c</sup> School of Biology and Chemistry, Minzu Normal University of Xingyi, Xingyi 562400, PR China

<sup>d</sup> The Engineering and Research Center for Integrated New Energy Photovoltaics and Energy Storage Systems of Hunan Province and School of Electrical Engineering, University of South China, Hengyang 421001, PR China

<sup>e</sup> State Key Laboratory of Biochemical Engineering, Key Laboratory of Biopharmaceutical Preparation and Delivery, Institute of Process Engineering, Chinese Academy of Sciences, Beijing 100190, PR China

<sup>f</sup> University of Chinese Academy of Sciences, Beijing 100049, PR China

\* Corresponding authors.

E-mail addresses: yilanhua@xtu.edu.cn (L. Yi), yiwei@xynun.edu.cn (W. Yi),

luyebo@zjxu.edu.cn (Y. Lu), wangxz@sustech.edu.cn (X. Wang)

## EXPERIMENTAL SECTION

**Synthesis of MIL-88.** 1.35 g of ferric chloride hexahydrate and 0.58 g of fumaric acid together were added to 25 mL of ultrapure water, sonicated for 10 min and then transferred to magnetic stirring to continue stirring for 30 min, followed by transferring it to a 50 mL hydrothermal reactor liner, and the assembled hydrothermal reaction device was placed in a preheated 65 °C blast drying oven for 12 h of reaction. After the end of the reaction cooled down to room temperature, the as-prepared product was centrifuged with ultrapure water and ethanol for three times, and finally sealed with perforated aluminum foil and placed in a vacuum drying oven at 70°C overnight to obtain the fleshy pink powder of MIL-88.<sup>1,2</sup>

**Synthesis of Fe<sub>7</sub>Se<sub>8</sub>/C and Fe<sub>7</sub>Se<sub>8</sub> catalysts.** After grinding the prepared MIL-88, a certain mass of MIL-88 and Se powder was weighed according to the ratio of 1:2 by mass and were mixed and ground evenly, and then spread it in a porcelain boat. Ar was chosen as the protective gas for the reaction, and the temperature was increased to 650°C with a gradient of 1.5°C min<sup>-1</sup> and kept the temperature of 650°C for 2 h before cooling to room temperature. The obtained Fe<sub>7</sub>Se<sub>8</sub>/C product was in the form of black powder. The preparation of Fe<sub>7</sub>Se<sub>8</sub> was the same as that of Fe<sub>7</sub>Se<sub>8</sub>/C, with the difference of replacing MIL-88 with Fe powder.<sup>3</sup>

**Preparation of the working electrode.** 5 mg of catalyst was ultrasonically dispersed in 1 mL of dispersant, which was a mixture of 0.75 mL of isopropanol and 0.25 mL of ultrapure water. After ultrasonication for 1 h, 20 µL of Nafion

solution (5 wt.%) was added and continued to be ultrasonicated for 10 min to obtain a well-dispersed ink mixture. Then, 0.1 mL of the obtained ink-like mixture was applied dropwise on the treated carbon paper, spreading as flat as possible with the coating area of 1 cm<sup>2</sup>, and the catalyst loading was 0.5 mg<sub>cat</sub> cm<sup>-2</sup>.

**Characterizations.** X-ray diffraction (XRD) patterns were recorded on a D/MAX-TTR III (CBO) instrument using Cu K $\alpha$  radiation ( $\lambda = 1.542 \text{ \AA}$ ). Scanning electron microscopy (SEM) was performed using a Hitachi S-8220 with a Hitachi S-4800. Transmission electron microscopy (TEM) studies were performed using a Tecnai G2 F20 U-TWIN with a Tecnai G2 T20 S-TWIN, and high-resolution transmission electron microscopy (HR-TEM) were obtained from the Tecnai G2 F20 U-TWIN. X-ray photoelectron spectroscopy (XPS) was performed using an ESCALAB 20 Xi. Nitrogen adsorption and desorption experiments were carried out using the specific surface area and porosity analyzer models Micromeritics APSP 2460 as well as ASAP 2420-4. Ultraviolet-visible (UV-vis) spectra were performed on a Hitachi U-3900H UV-vis spectrophotometer.

**Electrochemical Measurements.** All of the electrochemical tests were performed by the Shanghai Chenhua CHI660E electrochemical workstation using an H-type electrolytic cell adapted to the three-electrode system as the reaction device. The as-prepared Fe<sub>7</sub>Se<sub>8</sub>/C or Fe<sub>7</sub>Se<sub>8</sub> was used as the working electrode (WE), Ag/AgCl as the reference electrode (RE), and Pt mesh as the counter electrode (CE). The anode chamber was separated from the cathode

chamber using a Nafion 211 proton membrane. Ultrapure N<sub>2</sub> (99.999%) or Ar (99.999%) was continuously blown into 0.1 M Na<sub>2</sub>SO<sub>4</sub> electrolyte for at least 30 min before each test. The potentials were converted to reversible hydrogen electrode (RHE) values by [Equation 1](#):

$$E(\text{vs. RHE}) = E(\text{vs. Ag/AgCl}) + 0.059 \times pH + 0.197 V \quad (1)$$

**Determination of NH<sub>3</sub>.** The electrolytic reduction products were detected using salicylic acid color development method combined with UV-vis absorption spectroscopy.<sup>4</sup> The steps of the method were as follows: 8 mL of electrolyte was removed from the cathode chamber, and then oxidizing solution, color developing solution and catalyst solution were added sequentially. 100 μL of oxidizing solution containing NaClO (pCl = 4 ~ 4.9) and 0.75 M NaOH was firstly added to the electrolyte, and then 1000 μL of color-developing solution containing 0.4 M sodium salicylate, 0.32 M NaOH and 100 μL of catalyst solution (200 mg of sodium nitrosferricyanide dihydrate dissolved in 20 mL of ultrapure water) were added. After being left in the dark for 2 h, it was measured at 660 nm and the corresponding absorbance was recorded. A standard curve was obtained by preparing ammonium chloride solution with known concentration gradient (electrolyte was 0.1 mol L<sup>-1</sup> Na<sub>2</sub>SO<sub>4</sub>), and after linear fitting a standard linear fitting equation was obtained  $y=0.4423x-0.0047$ ,  $R^2=0.998$  ([Figure S8](#)).

**Determination of N<sub>2</sub>H<sub>4</sub>.** Hydrazine hydrate was detected by Watt and Chrisp's method using UV-vis absorption spectrophotometer.<sup>5</sup> The specific tests and steps were as follows: 5.99 g of p-C<sub>9</sub>H<sub>11</sub>NO, 30 mL of HCl and 300 mL of

C<sub>2</sub>H<sub>5</sub>OH were mixed homogeneously to be used as a color developing reagent. 2 mL of electrolyte was removed from the cathode chamber and 2 mL of color developing reagent was added. The resulting solution was stirred at room temperature for 15 min and then its absorbance was tested at 455 nm. A standard curve was obtained by preparing N<sub>2</sub>H<sub>4</sub>-H<sub>2</sub>O solution with known concentration gradient (electrolyte was 0.1 mol L<sup>-1</sup> Na<sub>2</sub>SO<sub>4</sub>), and after linear fitting a standard linear fitting equation was obtained as  $y=0.1702x+0.034$ ,  $R^2=0.999$  (Figure S9).

**Calculations of the NH<sub>3</sub> yield rate and FE.** The rate of NH<sub>3</sub> yield rate is calculated according to Equation 2:

$$R_{\text{NH}_3 \text{ yield}} = (c_{\text{NH}_3} \times V) / (t \times m_{\text{cat}}) \quad (2)$$

where  $c_{\text{NH}_3}$  is the NH<sub>3</sub> concentration ( $\mu\text{g mL}^{-1}$ ),  $V$  is the electrolyte volume (mL),  $t$  is the electrolysis time (h),  $m_{\text{cat}}$  is the catalyst mass loading (mg). Considering that there are 3 mol electrons transferred to produce 1 mol NH<sub>3</sub>, the Faradaic efficiency (FE) can be calculated by Equation 3:

$$\text{FE} = (3F \times c_{\text{NH}_3} \times V) / 17Q \quad (3)$$

where  $F$  is Faraday constant ( $96485 \text{ C mol}^{-1}$ ),  $Q$  is average electricity quantity throughout the reaction process.

## GRAPHICS

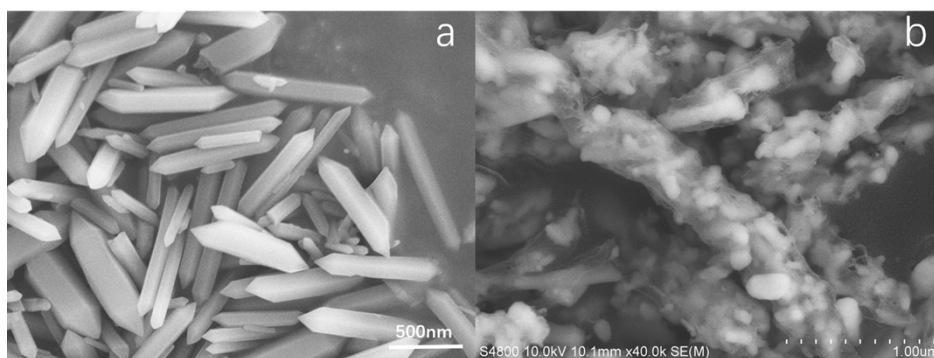

**Fig. S1.** SEM images of (a) MIL-88 and (b) Fe<sub>7</sub>Se<sub>8</sub>/C.

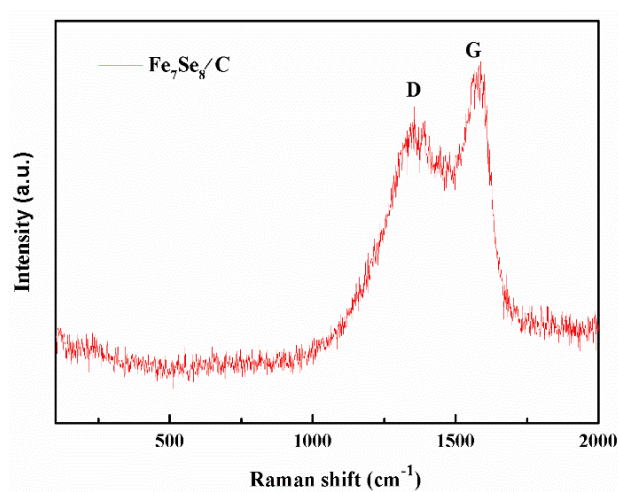

**Fig. S2.** Raman pattern of Fe<sub>7</sub>Se<sub>8</sub>/C.

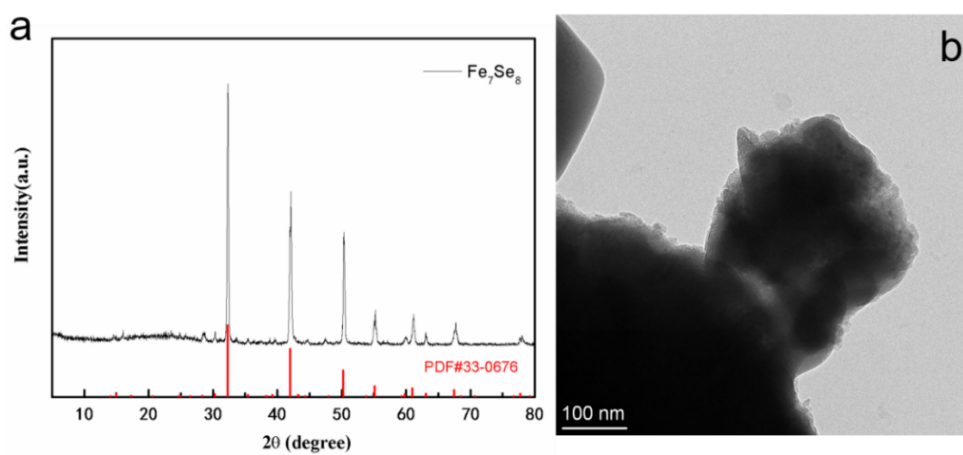

**Fig. S3.** (a) XRD patterns and (b) TEM image of Fe<sub>7</sub>Se<sub>8</sub>.

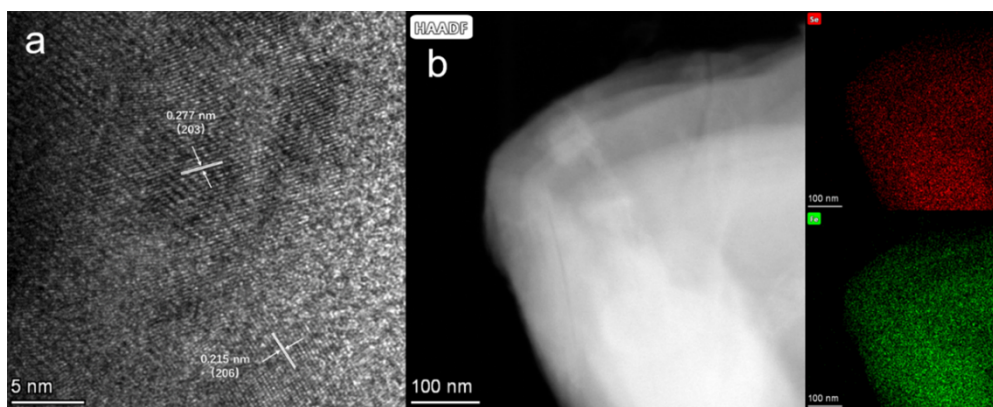

**Fig. S4.** (a) HR-TEM picture, (b) HAADF-STEM picture and corresponding EDS elemental distribution of  $\text{Fe}_7\text{Se}_8$ .

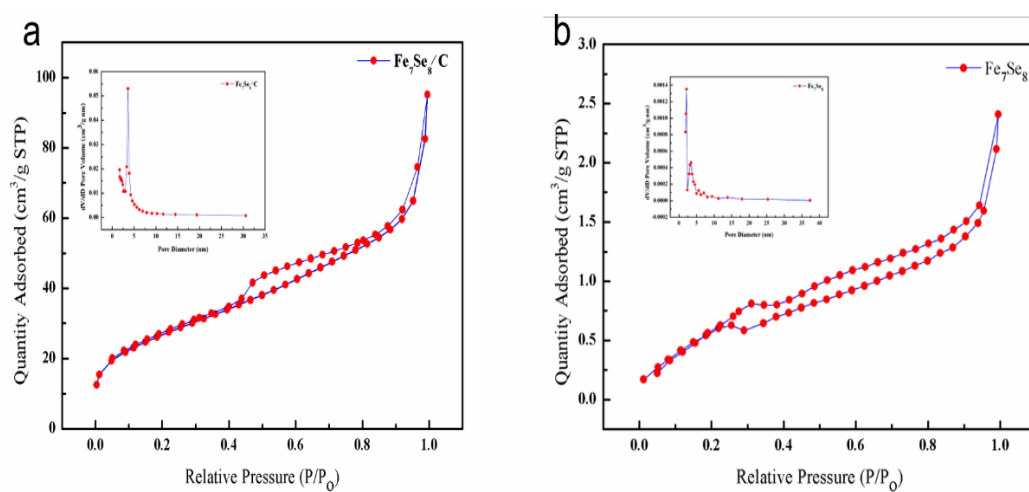

**Fig. S5.** BET isotherm of (a)  $\text{Fe}_7\text{Se}_8/\text{C}$  and (b)  $\text{Fe}_7\text{Se}_8$  illustrated with corresponding BJH aperture distribution

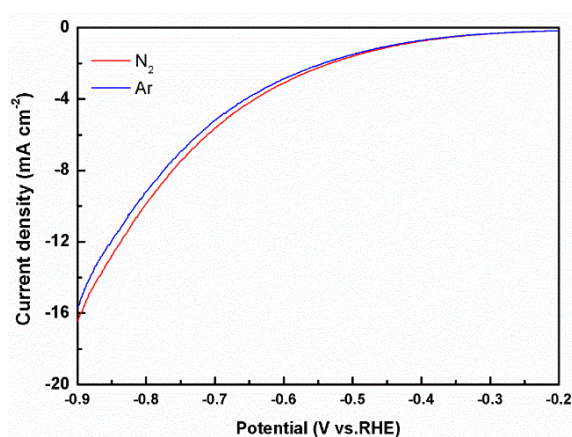

**Fig. S6.** LSV curves of  $\text{Fe}_7\text{Se}_8/\text{C}$  in different atmospheres.

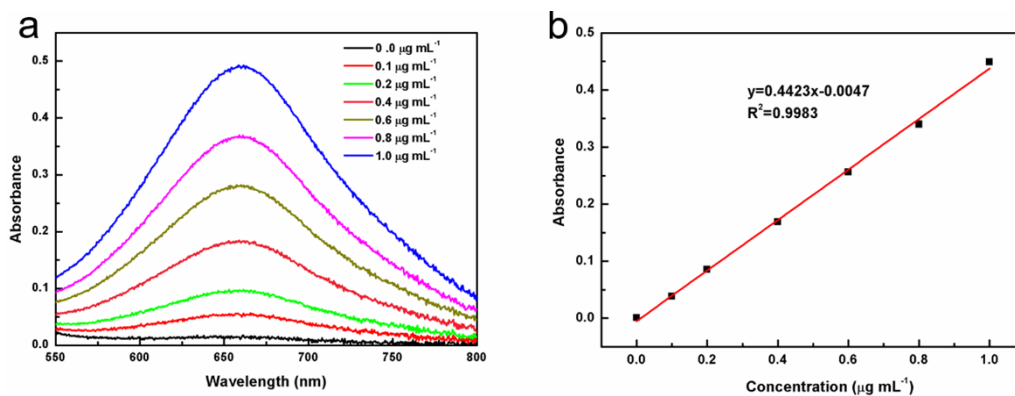

**Fig. S7.** (a) UV-vis absorbance plots and (b) linear fitting curves and fitting equations of  $\text{NH}_4\text{Cl}$  standard solutions at gradient concentrations.

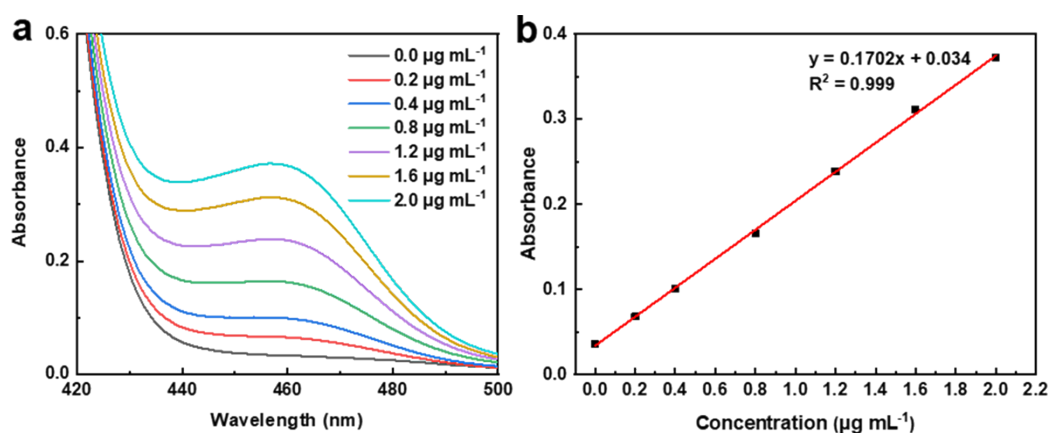

**Fig. S8.** (a) UV-vis absorbance plots, (b) linear fitting curves and fitting equations of  $\text{N}_2\text{H}_4\text{-H}_2\text{O}$  standard solutions at gradient concentrations.

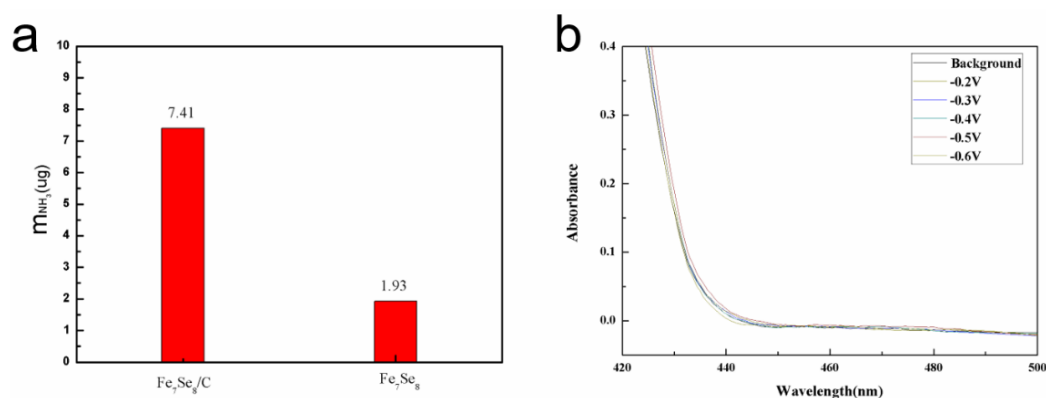

**Fig. S9.** (a) Plots of the yield of  $\text{NH}_3$  rate comparison of  $\text{Fe}_7\text{Se}_8/\text{C}$  and  $\text{Fe}_7\text{Se}_8$ , (b)  $\text{N}_2\text{H}_4\text{-H}_2\text{O}$  detection of  $\text{Fe}_7\text{Se}_8/\text{C}$  catalyst.



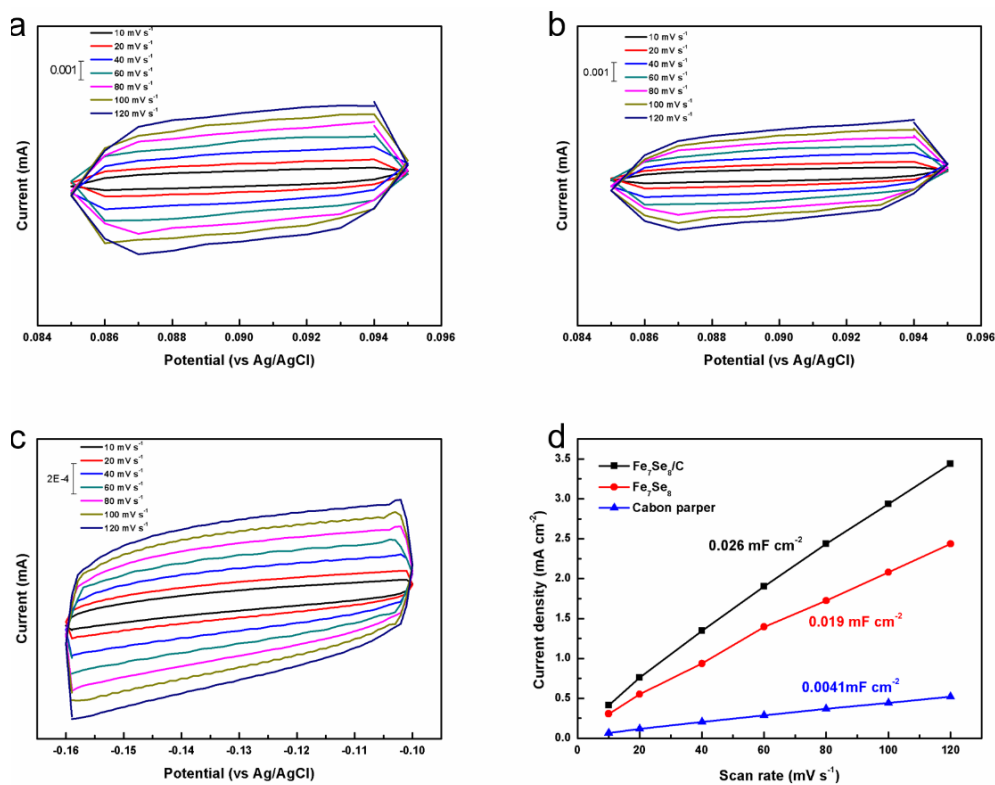

**Fig. S10.** CV curves of (a)  $\text{Fe}_7\text{Se}_8/\text{C}$ , (b)  $\text{Fe}_7\text{Se}_8$ , (c) carbon paper, and (d) comparison of bilayer capacitance of  $\text{Fe}_7\text{Se}_8/\text{C}$ ,  $\text{Fe}_7\text{Se}_8$ , carbon paper.

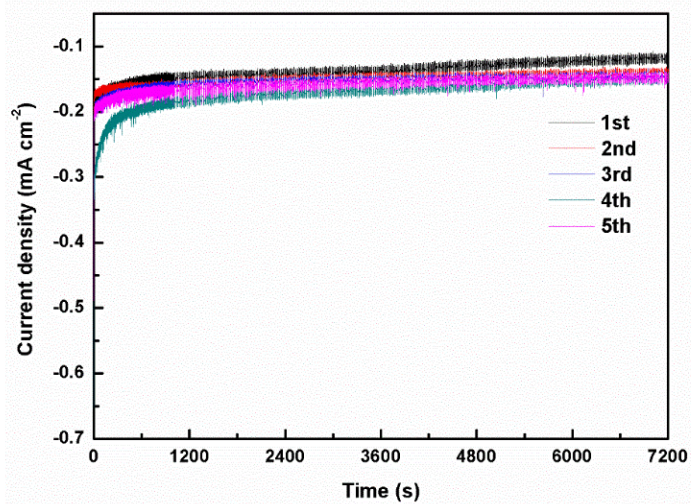

**Fig. S11.** Current density-time curve corresponding to five cycles of  $\text{Fe}_7\text{Se}_8/\text{C}$ .

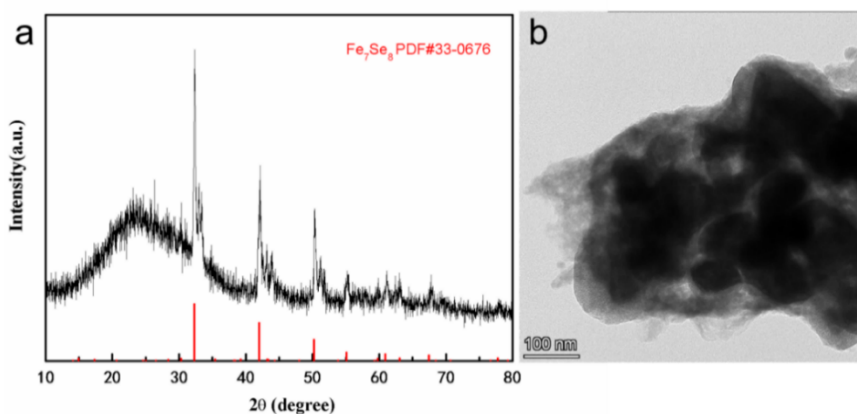

**Fig. S12.** (a) XRD patterns and (b) TEM image of  $\text{Fe}_7\text{Se}_8/\text{C}$  catalyzed.

## REFERENCES

- (1) Lee, H. J.; Cho, W.; Lim, E.; Oh, M. One-pot Synthesis of Magnetic Particle-Embedded Porous Carbon Composites from Metal-Organic Frameworks and Their Sorption Properties. *Chemical Communications*, **2014**, *50*, 5476-5479.
- (2) Park, S.-K.; Kim, J. K.; Kang, Y. C. Electrochemical Properties of Uniquely Structured  $\text{Fe}_2\text{O}_3$  and  $\text{FeSe}_2/\text{Graphitic-Carbon}$  Microrods Synthesized by Applying a Metal-Organic Framework. *Chemical Engineering Journal*, **2018**, *334*, 2440-2449.
- (3) Sun, Z.; Wu, X.; Gu, Z.; Han, P.; Zhao, B.; Qu, D.; Gao, L.; Liu, Z.; Han, D.; Niu, L. Rationally Designed Nitrogen-Doped Yolk-Shell  $\text{Fe}_7\text{Se}_8/\text{Carbon}$  Nanoboxes with Enhanced Sodium Storage in Half/Full Cells. *Carbon*, **2020**, *166*, 175-182.
- (4) Chen, S.; Perathoner, S.; Ampelli, C.; Mebrahtu, C.; Su, D.; Centi, G. Electrocatalytic Synthesis of Ammonia at Room Temperature and Atmospheric Pressure from Water and Nitrogen on a Carbon-Nanotube-Based Electrocatalyst. *Angewandte Chemie International Edition*, **2017**, *56*, 2699-2703.
- (5) Watt, G. W.; Chrisp, J. D. Spectrophotometric Method for Determination of Hydrazine. *Analytical Chemistry*, **1952**, *24*, 2006-2008.
